# Supplementary material for: Breast and prostate cancer risk: the interplay of polygenic risk, high-impact monogenic variants, and family history
Source: bioRxiv or medRxiv preprint supplement (doi:10.1101/2021.06.04.21258277), 2021-06-09
Supplement: Supplementary file [file media-2.pdf]

# Breast and prostate cancer risk: the interplay of polygenic risk, high-impact monogenic variants, and family history

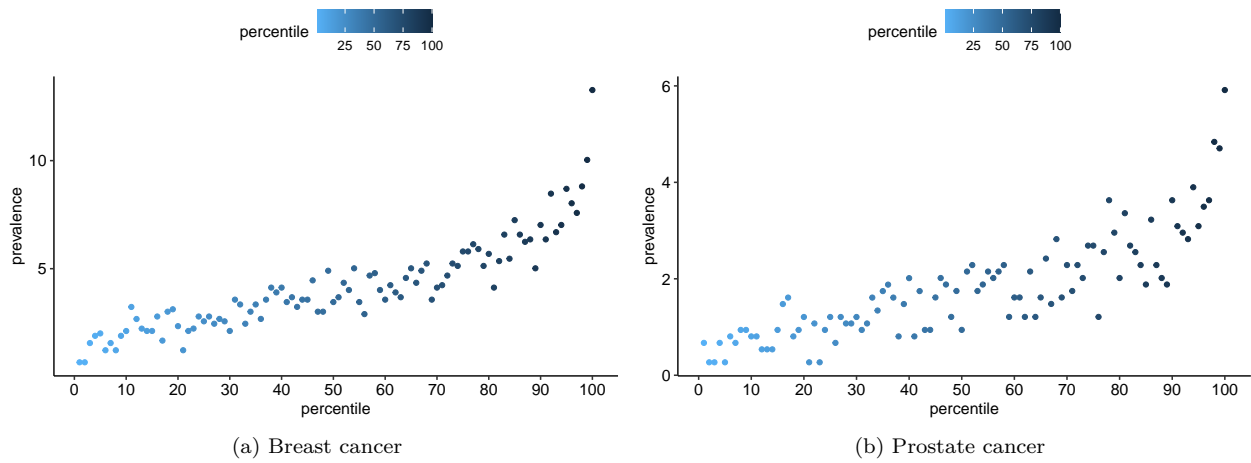

Figure S1: Prevalence of the breast and prostate cancer according to polygenic risk score (PRS) percentiles.

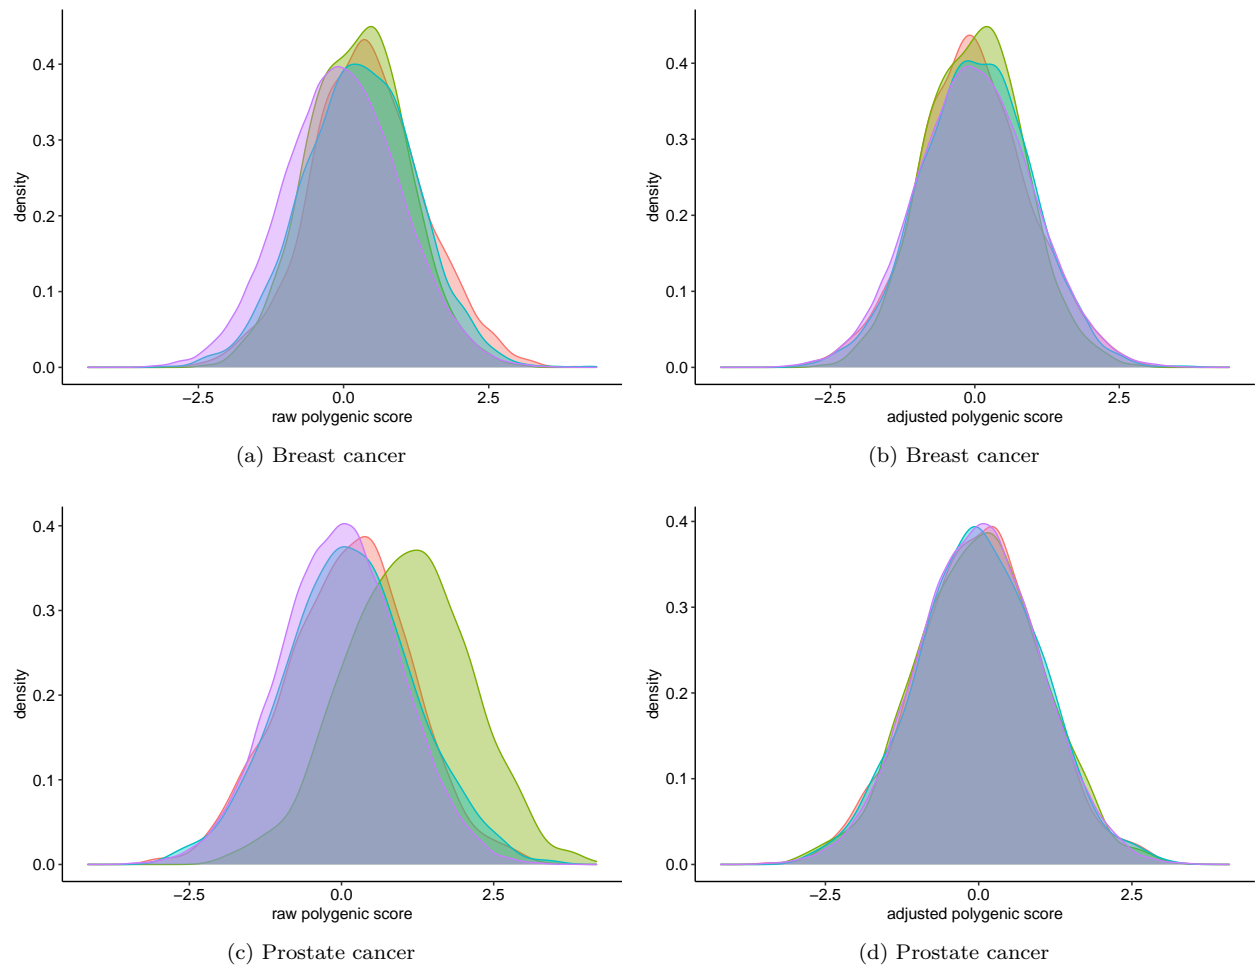

Figure S2: Distributions of the breast and prostate cancer PRS across self-reported ethnic groups in the UK Biobank cohort (Data-Field 21000). Raw PRS was adjusted using first four principal components. Distributions of: a) raw PRS in breast cancer; b) adjusted PRS in breast cancer; c) raw PRS in prostate cancer; d) adjusted PRS in prostate cancer.

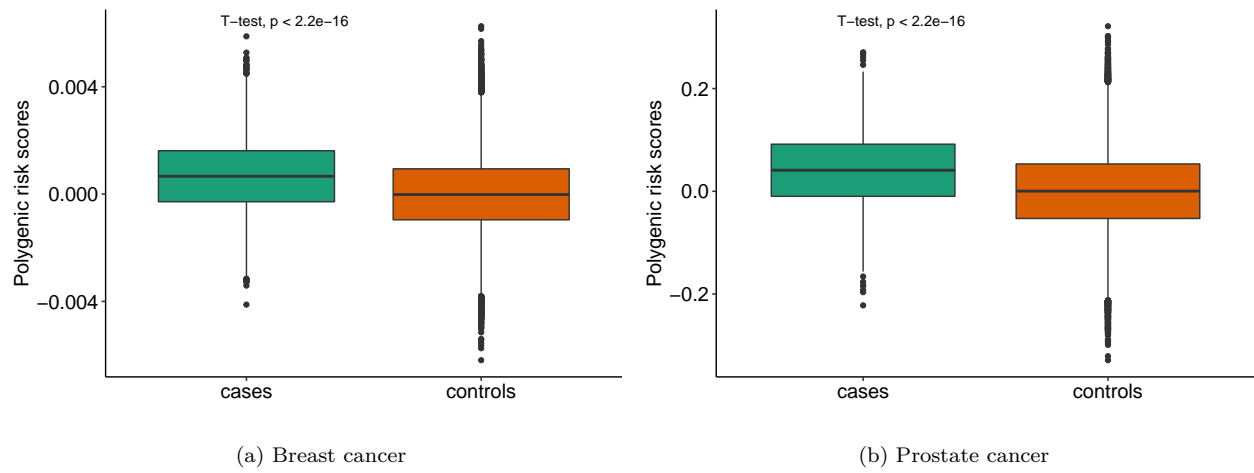

Figure S3: PRS among breast and prostate cases versus controls.

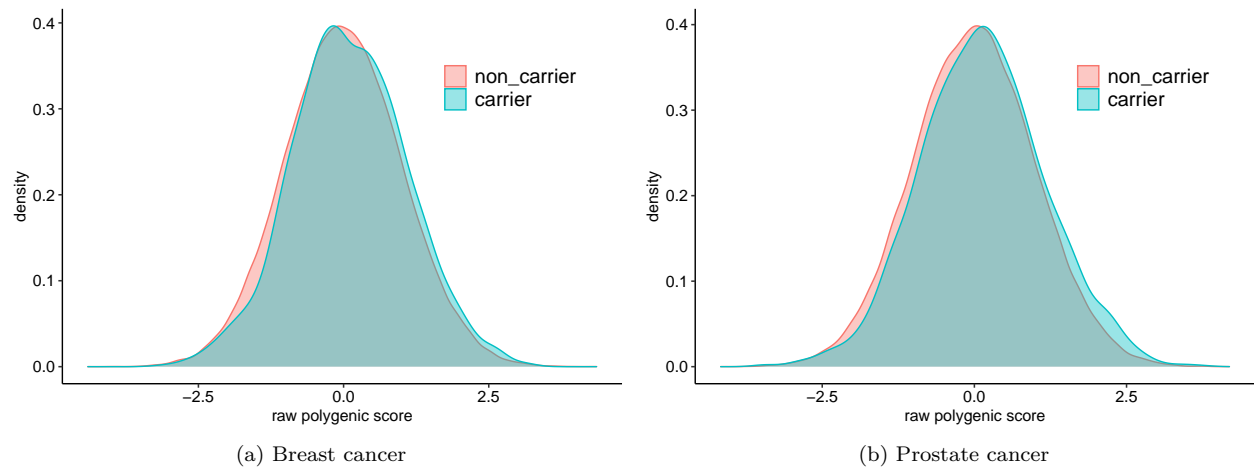

Figure S4: Distributions of the breast and prostate cancer PRS across carrier status in the UK Biobank cohort.

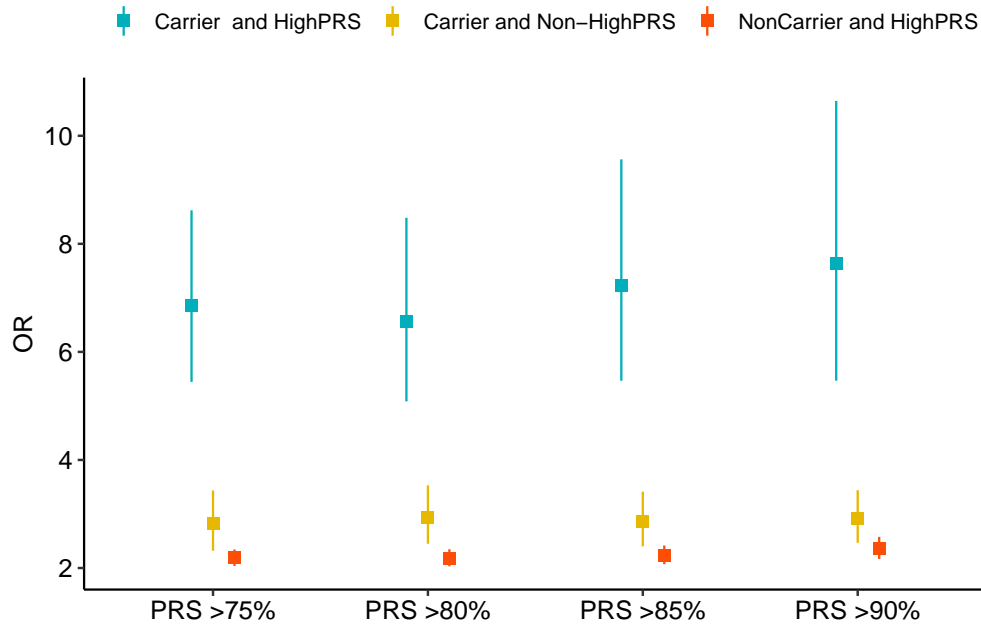

(a) breast cancer

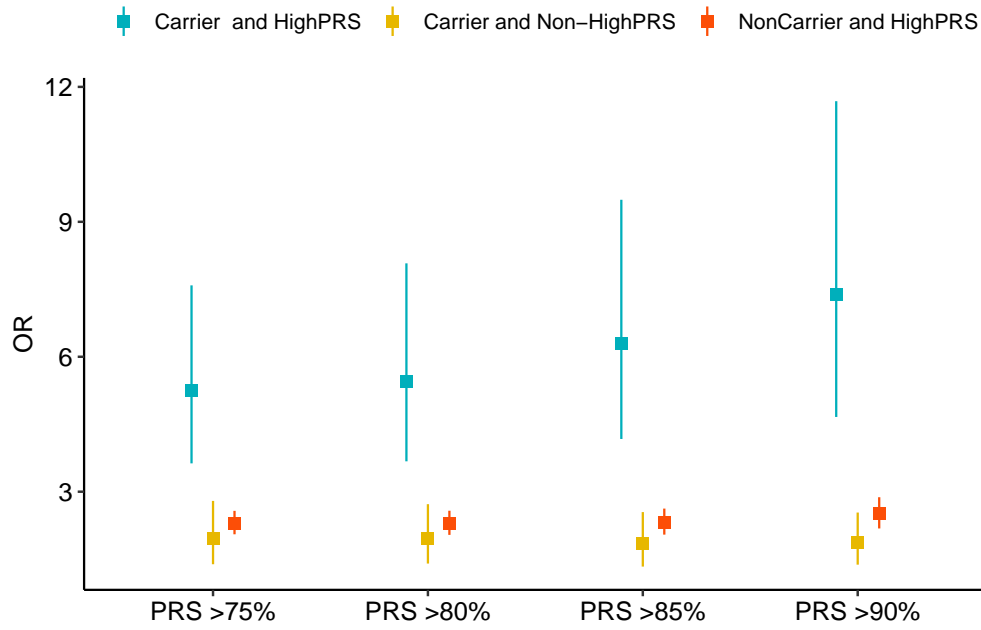

(b) prostate cancer

Figure S5: Impact of PRS across individuals with monogenic variants carriers.

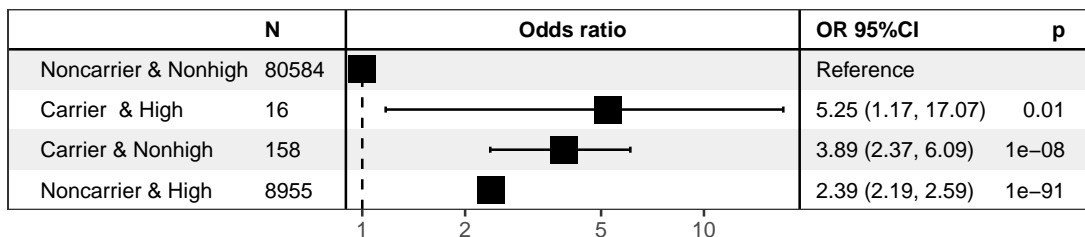

(a) PALB2

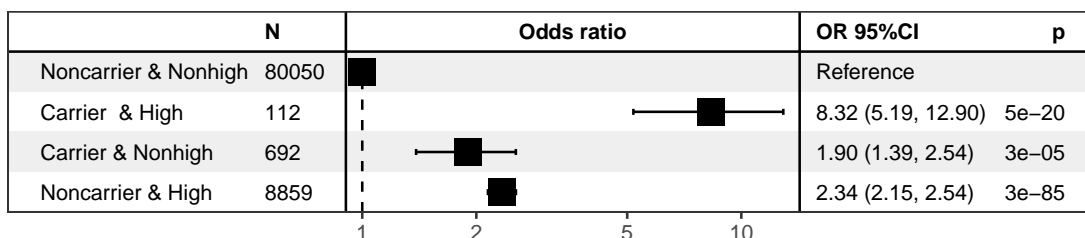

(b) CHEK2

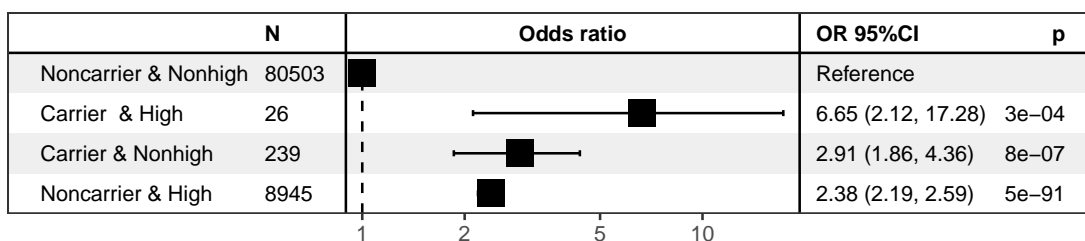

(c) BRCA1

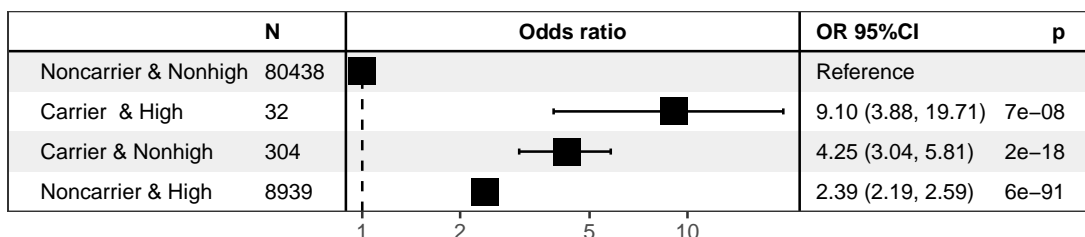

(d) BRCA2

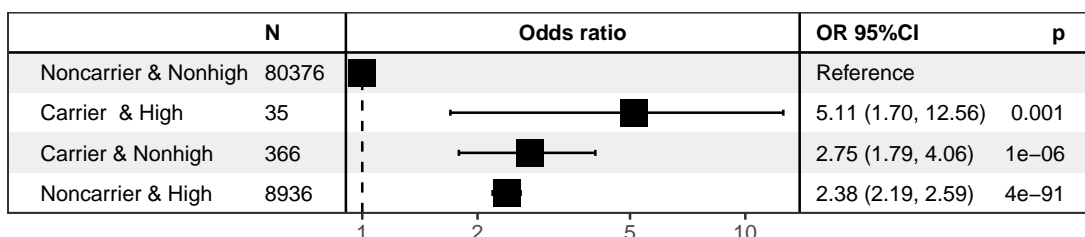

(e) ATM

Figure S6: Breast cancer odds ratio (OR) among individuals stratified for presence of high-impact variants in each gene and PRS.

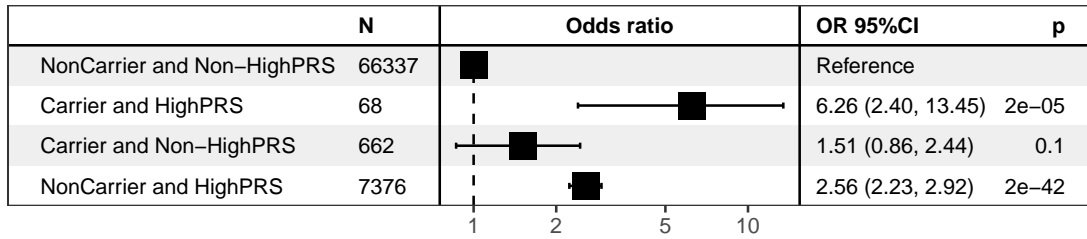

(a) CHEK2

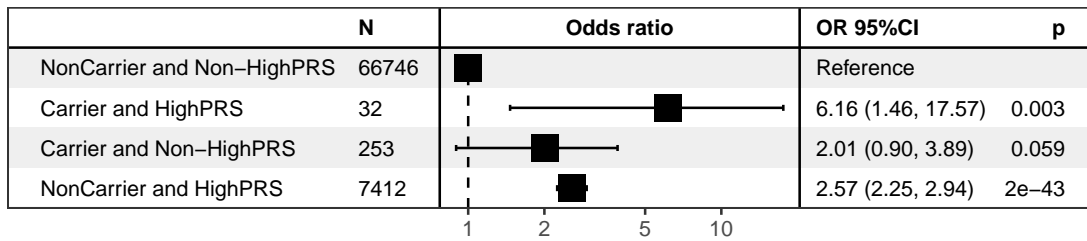

(b) ATM

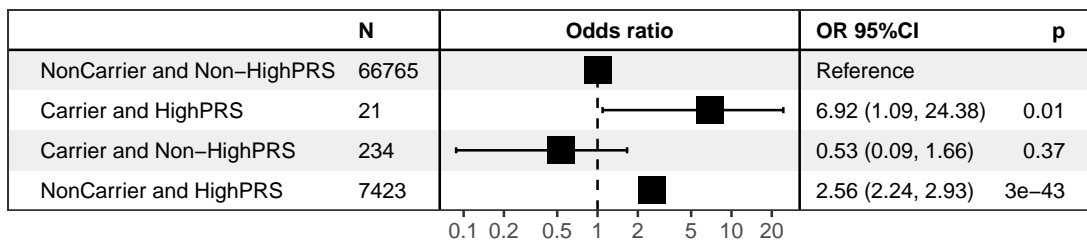

(c) BRCA1

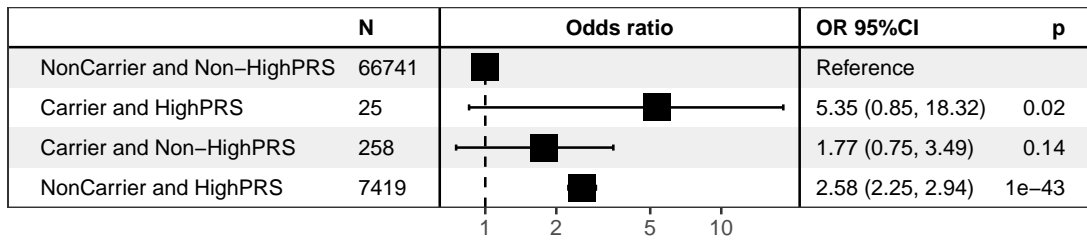

(d) BRCA2

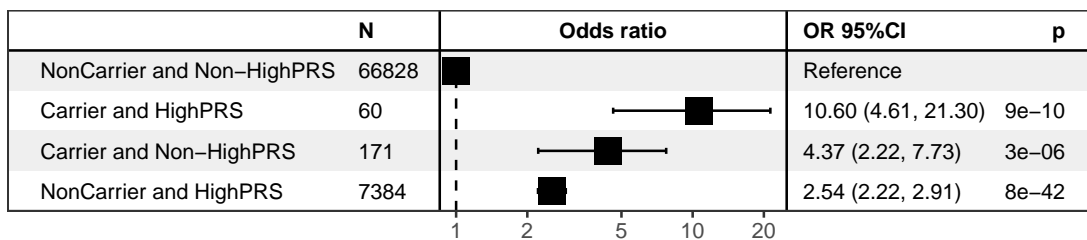

(e) HOXB13

Figure S7: Prostate cancer OR among individuals stratified for presence of high-impact variants in each gene and PRS.

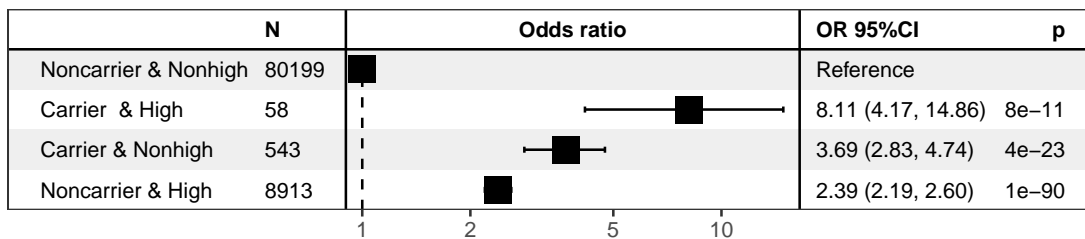

(a) high risk variants (BRCA1, BRCA2)

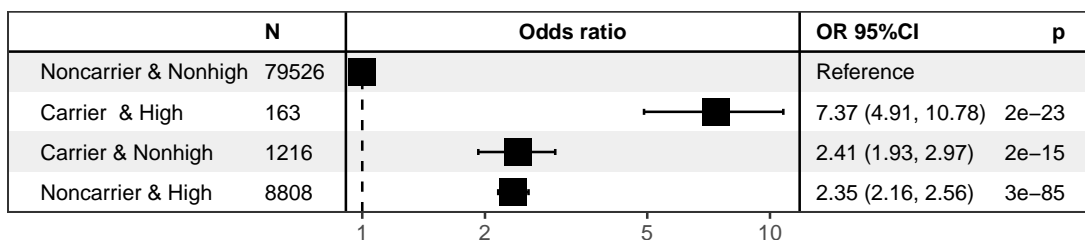

(b) intermediate risk variants (PALB2, CHEK2, ATM)

Figure S8: Breast cancer OR among individuals stratified for presence of high-impact variants carrier in intermediate and high risk variants and PRS.

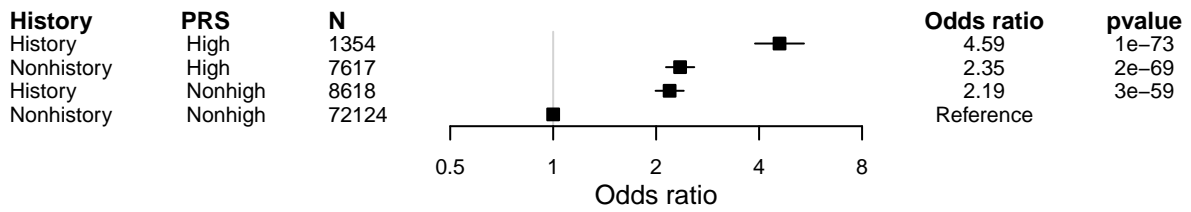

Figure S9: Breast cancer OR among individuals stratified for presence of a first-degree family history with breast cancer and PRS.

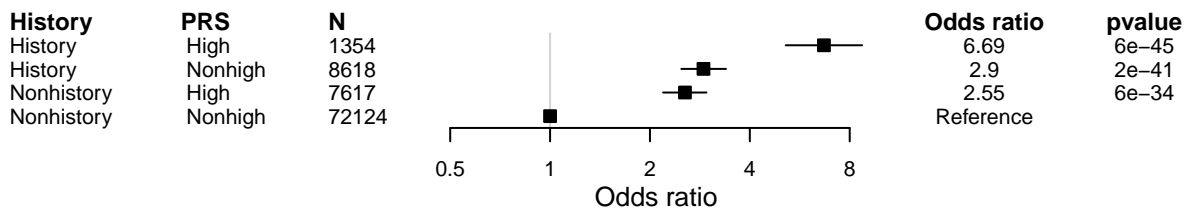

Figure S10: Prostate cancer OR among individuals stratified for presence of a first-degree family history with prostate cancer and PRS.



Table S1: Characteristics of participants by breast cancer status.

|                                        | Cases        | Controls     |
|----------------------------------------|--------------|--------------|
| Participants, N                        | 3739         | 85974        |
| Age*, mean (SD)                        | 52.23 (7.57) | 56.83 (8.35) |
| Family history of breast cancer, n (%) | 762 (20.38)  | 9210 (10.71) |

\* Age: age at onset for cases, and age at recruitment for controls

Table S2: Characteristics of participants by prostate cancer status.

|                                          | Cases        | Controls     |
|------------------------------------------|--------------|--------------|
| Participants, N                          | 1332         | 73111        |
| Age*, mean (SD)                          | 60.35 (4.44) | 57.02 (8.68) |
| Family history of prostate cancer, n (%) | 273 (20.5)   | 5689 (7.78)  |

\* Age: age at onset for cases, and age at recruitment for controls
